# Supplementary material
Source: publisher figshare collection journal article supplement (https://tandf.figshare.com/ndownloader/files/13686254)
Supplement: Supplementary file 1 [file 13686254]

## Sheet: Infos patient
	Données socio-démographiques
	Please enter here the sociodemographic information of the patient and this information will be automatically copied in the "RAVLT" sheet.
	Age		years
	Sex		0 = Woman 1 = Man
	Education		years

## Sheet: 50-60
Centiles pour les personnes de 50-60 ans
0-12 ans d'éducation				plus de 12 ans d'éducation
Subtest	Score	Centile		Subtest	Score	Centile
Attention	#REF!	#REF!		Attention	#REF!	#REF!
Initiation	#REF!	#REF!		Initiation	#REF!	#REF!
Construction	#REF!	#REF!		Construction	#REF!	#REF!
Concepts	#REF!	#REF!		Concepts	#REF!	#REF!
Mémoire	#REF!	#REF!		Mémoire	#REF!	#REF!
Total	#REF!	#REF!		Total	#REF!	#REF!
N=	30			N=	123
	Score Z
Age	#REF!
Education	#REF!

## Sheet: 61-65
Centiles pour les personnes de 61-65 ans
0-12 ans d'éducation				plus de 12 ans d'éducation
Subtest	Score	Centile		Subtest	Score	Centile
Attention	#REF!	#REF!		Attention	#REF!	#REF!
Initiation	#REF!	#REF!		Initiation	#REF!	#REF!
Construction	#REF!	#REF!		Construction	#REF!	#REF!
Concepts	#REF!	#REF!		Concepts	#REF!	#REF!
Mémoire	#REF!	#REF!		Mémoire	#REF!	#REF!
Total	#REF!	#REF!		Total	#REF!	#REF!
N=	57			N=	128
	Score Z
Age	#REF!
Education	#REF!

## Sheet: 66-70
Centiles pour les personnes de 66-70 ans
0-12 ans d'éducation				plus de 12 ans d'éducation
Subtest	Score	Centile		Subtest	Score	Centile
Attention	#REF!	#REF!		Attention	#REF!	#REF!
Initiation	#REF!	#REF!		Initiation	#REF!	#REF!
Construction	#REF!	#REF!		Construction	#REF!	#REF!
Concepts	#REF!	#REF!		Concepts	#REF!	#REF!
Mémoire	#REF!	#REF!		Mémoire	#REF!	#REF!
Total	#REF!	#REF!		Total	#REF!	#REF!
N=	89			N=	134
	Score Z
Age	#REF!
Education	#REF!

## Sheet: 71-75
Centiles pour les personnes de 71-75 ans
0-12 ans d'éducation				plus de 12 ans d'éducation
Subtest	Score	Centile		Subtest	Score	Centile
Attention	#REF!	#REF!		Attention	#REF!	#REF!
Initiation	#REF!	#REF!		Initiation	#REF!	#REF!
Construction	#REF!	#REF!		Construction	#REF!	#REF!
Concepts	#REF!	#REF!		Concepts	#REF!	#REF!
Mémoire	#REF!	#REF!		Mémoire	#REF!	#REF!
Total	#REF!	#REF!		Total	#REF!	#REF!
N=	92			N=	120
	Score Z
Age	#REF!
Education	#REF!

## Sheet: 76-85
Centiles pour les personnes de 76-85 ans
0-12 ans d'éducation				plus de 12 ans d'éducation
Subtest	Score	Centile		Subtest	Score	Centile
Attention	#REF!	#REF!		Attention	#REF!	#REF!
Initiation	#REF!	#REF!		Initiation	#REF!	#REF!
Construction	#REF!	#REF!		Construction	#REF!	#REF!
Concepts	#REF!	#REF!		Concepts	#REF!	#REF!
Mémoire	#REF!	#REF!		Mémoire	#REF!	#REF!
Total	#REF!	#REF!		Total	#REF!	#REF!
N=	74			N=	69
	Score Z
Age	#REF!
Education	#REF!

## Sheet: Pedraza_66
Centiles pour les personnes de moins de 67 ans – PEDRAZA 2010
Subtest	Score	Centiles	Age	Edu	Z Edu
Attention	#REF!	#REF!	#REF!	#REF!	#REF!
Initiation	#REF!	#REF!	#REF!	#REF!	#REF!
Construction	#REF!	#REF!	#REF!	#REF!	#REF!
Concepts	#REF!	#REF!	#REF!	#REF!	#REF!
Mémoire	#REF!	#REF!	#REF!	#REF!	#REF!
Total	#REF!	#REF!	#REF!	#REF!	#REF!
N=	115

## Sheet: Pedraza_67-69
Centiles pour les personnes de 67-69 ans – PEDRAZA 2010
Subtest	Score	Centiles	Scaled scores	Edu	Z Edu
Attention	#REF!	#REF!	#REF!	#REF!	#REF!
Initiation	#REF!	#REF!	#REF!	#REF!	#REF!
Construction	#REF!	#REF!	#REF!	#REF!	#REF!
Concepts	#REF!	#REF!	#REF!	#REF!	#REF!
Mémoire	#REF!	#REF!	#REF!	#REF!	#REF!
Total	#REF!	#REF!	#REF!	#REF!	#REF!
N=	262

## Sheet: Pedraza_70-72
Centiles pour les personnes de 70-72 ans – PEDRAZA 2010
Subtest	Score	Centiles	Scaled scores	Edu	Z Edu
Attention	#REF!	#REF!	#REF!	#REF!	#REF!
Initiation	#REF!	#REF!	#REF!	#REF!	#REF!
Construction	#REF!	#REF!	#REF!	#REF!	#REF!
Concepts	#REF!	#REF!	#REF!	#REF!	#REF!
Mémoire	#REF!	#REF!	#REF!	#REF!	#REF!
Total	#REF!	#REF!	#REF!	#REF!	#REF!
N=	358

## Sheet: Pedraza_73-75
Centiles pour les personnes de 73-75 ans – PEDRAZA 2010
Subtest	Score	Centiles	Scaled scores	Edu	Z Edu
Attention	#REF!	#REF!	#REF!	#REF!	#REF!
Initiation	#REF!	#REF!	#REF!	#REF!	#REF!
Construction	#REF!	#REF!	#REF!	#REF!	#REF!
Concepts	#REF!	#REF!	#REF!	#REF!	#REF!
Mémoire	#REF!	#REF!	#REF!	#REF!	#REF!
Total	#REF!	#REF!	#REF!	#REF!	#REF!
N=	460

[truncated: 7 more sheets: Pedraza_76-78, Pedraza_79-81, Pedraza_82-84, Pedraza_85-87, Pedraza_88-90, Pedraza_91, RAVLT]
